# Supplementary material for: Safety and Effectiveness of Perioperative Hyperthermic Intraperitoneal Chemotherapy with Gemcitabine in Patients with Resected Pancreatic Ductal Adenocarcinoma: Clinical Trial EudraCT 2016-004298-41
Source: MDPI journal article supplement (doi:10.3390/cancers16091718), 2024-04-28
Supplement: s1 [file s1]

| Characteristics                                |                           | Group II (n=21) | Group I (n=21) | P-value |
|------------------------------------------------|---------------------------|-----------------|----------------|---------|
| Age (years, <i>M</i> ± <i>SEM</i> )            |                           | 64 ± 1.7        | 69.3 ± 2       | 0.024   |
| Overall survival (months, <i>median</i> )      |                           | 17.1 (0.6-61.9) | 18 (0.8-61.8)  | ns      |
| Disease-free survival (months, <i>median</i> ) |                           | 14 (2-66)       | 10 (2-66)      | ns      |
| Operative time (minutes, <i>median</i> )       |                           | 350 (280-420)   | 300 (120-360)  | 0.002   |
| Hospital stay (days, <i>median</i> )           |                           | 11 (7-28)       | 17 (4-69)      | ns      |
| PaCSCs (CXCR4+CD133+EpCAM)                     |                           | 19.7 ± 8.2      | 13.8 ± 7.1     | ns      |
| Sex                                            |                           | <i>n</i> (%)    | <i>n</i> (%)   |         |
|                                                | Male                      | 6 (29)          | 13 (62)        | 0.03    |
|                                                | Female                    | 15 (71)         | 8 (38)         |         |
| Symptoms                                       |                           |                 |                |         |
|                                                | HTA                       | 10 (48)         | 9 (43)         | ns      |
|                                                | DM                        | 9 (43)          | 7 (33)         | ns      |
|                                                | DL                        | 10 (48)         | 6 (29)         | ns      |
|                                                | Jaundice                  | 17 (81)         | 12 (57)        | ns      |
|                                                | Abdomnal pain             | 8 (38)          | 7 (33)         | ns      |
|                                                | Constitutional syndrome   | 5 (24)          | 5 (24)         | ns      |
| Resections                                     |                           |                 |                |         |
|                                                | TP without splenectomy    | 1 (5)           | 4 (19)         | ns      |
|                                                | TP with splenectomy       | 9 (43)          | 5 (24)         | ns      |
|                                                | CDP                       | 9 (43)          | 8 (38)         | ns      |
|                                                | STP                       | 1 (5)           | 1 (5)          | ns      |
|                                                | DP                        | 0               | 1 (5)          | ns      |
|                                                | CCP                       | 1 (5)           | 2 (10)         | ns      |
| Pancreatitis complications                     |                           |                 |                |         |
|                                                | Delayed gastric emptying  | 2 (10)          | 2 (10)         | ns      |
|                                                | Pancreatic fistula (B, C) | 0               | 1 (5)          | ns      |
|                                                | Haemorrhage               | 0               | 2 (10)         | ns      |
| Clavien-Dindo                                  |                           |                 |                |         |
|                                                | I                         | 4 (19)          | 3 (14)         | ns      |
|                                                | II                        | 5 (24)          | 3 (14)         |         |
|                                                | III                       | 2 (10)          | 3 (14)         |         |
|                                                | IV                        | 0               | 1 (5)          |         |
|                                                | V                         | 1 (5)           | 1 (5)          |         |
| Differentiation                                |                           |                 |                |         |
|                                                | Good                      | 4 (19)          | 3 (14)         | ns      |
|                                                | Moderate                  | 7 (33)          | 14 (67)        |         |
|                                                | Poor                      | 10 (48)         | 4 (19)         |         |
| Invasion                                       |                           |                 |                |         |
|                                                | Neurologic invasion       | 15 (71)         | 15 (71)        | ns      |
|                                                | Vascular invasion         | 7 (33)          | 8 (38)         | ns      |
|                                                | Lymphatic Invasion        | 7 (33)          | 11 (52)        | ns      |

|                         |         |         |       |
|-------------------------|---------|---------|-------|
| TNM                     |         |         |       |
| Ia                      | 2 (10)  | 5 (24)  |       |
| Ib                      | 6 (29)  | 3 (14)  |       |
| IIa                     | 1 (5)   | 2 (10)  | ns    |
| IIb                     | 6 (29)  | 8 (38)  |       |
| III                     | 6 (29)  | 3 (14)  |       |
| Locoregional recurrence | 2 (10)  | 11 (52) | 0.004 |
| Distant recurrence      | 9 (43)  | 8 (38)  | ns    |
| Mortality (> 30 days)   | 13 (62) | 13 (62) | ns    |

| Parameters        | Group II (n=21) | Group I (n=21) | P-value |
|-------------------|-----------------|----------------|---------|
| Pre-Creatinina    | 0.9 ± 0.3       | 0.9 ± 0.1      | ns      |
| Creatinine 24h    | 4.1 ± 3.1       | 1.3 ± 0.1      | 0.034   |
| Creatinina 7 days | 1.0 ± 0.2       | 0.9 ± 0.2      | ns      |
| Pre-Urea          | 31.8 ± 2.0      | 39.5 ± 3.2     | 0.048   |
| Urea 24h          | 32.2 ± 2.2      | 45.5 ± 5.9     | ns      |
| Urea 7 days       | 35.4 ± 4.6      | 43.7 ± 5.2     | ns      |
| Pre-BB            | 9.7 ± 4.0       | 6.6 ± 1.9      | ns      |
| BB 24h            | 3.9 ± 1.2       | 2.6 ± 0.6      | ns      |
| BB 7 days         | 3.0 ± 1.3       | 2.4 ± 0.7      | ns      |
| Pre-GOT           | 112.7 ± 33.9    | 125.8 ± 34.5   | ns      |
| GOT 24h           | 115.4 ± 26.2    | 127.3 ± 25.9   | ns      |
| GOT 7 days        | 45.3 ± 4.5      | 52.6 ± 14.8    | ns      |
| Pre-GPT           | 112.9 ± 27.7    | 169.5 ± 47.1   | ns      |
| GPT 24h           | 119.7 ± 21.8    | 120.0 ± 18.5   | ns      |
| GPT 7 days        | 51.3 ± 4.0      | 73.1 ± 18.5    | ns      |
| Pre-Glu           | 154.0 ± 18.8    | 144.9 ± 14.0   | ns      |
| Glu 24h           | 152.7 ± 11.6    | 140.0 ± 9.4    | ns      |
| Glu 7 days        | 178.7 ± 22.1    | 202.7 ± 29.9   | ns      |
| Pre-Na            | 196.5 ± 57.3    | 138.8 ± 1.0    | ns      |
| Na 24h            | 201.9 ± 61.8    | 140.2 ± 0.9    | ns      |
| Na 7 days         | 216.7 ± 79.5    | 138.2 ± 1.5    | ns      |
| Pre-K             | 10.7 ± 3.5      | 4.4 ± 0.1      | ns      |
| K 24h             | 5.4 ± 1.4       | 4.3 ± 0.1      | ns      |
| K 7 days          | 6.6 ± 2.6       | 4.1 ± 0.1      | ns      |
| Pre-Cl            | 146.4 ± 43.2    | 102.3 ± 1.0    | ns      |
| Cl 24h            | 159.9 ± 51.0    | 106.4 ± 0.9    | 0.046   |
| Cl 7 days         | 99.9 ± 1.6      | 100.0 ± 1.3    | ns      |
| Pre-Proact        | 91.6 ± 1.9      | 85.8 ± 3.1     | ns      |
| Proact 24h        | 77.0 ± 2.4      | 76.3 ± 3.2     | ns      |
| Proact 7 days     | 90.6 ± 2.5      | 87.2 ± 3.1     | ns      |
| Pre-PT            | 18.4 ± 6.6      | 13.3 ± 1.2     | ns      |
| TP 24h            | 32.0 ± 13.4     | 13.7 ± 0.9     | ns      |

|                         |              |              |       |
|-------------------------|--------------|--------------|-------|
| PT 7 days               | 30.2 ± 18.0  | 13.3 ± 1.0   | ns    |
| Pre-RBC                 | 5.5 ± 1.3    | 4.1 ± 0.2    | ns    |
| RBC 24h                 | 4.3 ± 0.9    | 3.4 ± 0.1    | ns    |
| RBC 7 days              | 5.3 ± 1.9    | 3.2 ± 0.1    | ns    |
| Pre-Pla                 | 284.7 ± 17.6 | 282.0 ± 24.5 | ns    |
| Pla 24h                 | 229.5 ± 18.3 | 228.5 ± 19.4 | ns    |
| Pla 7 days              | 293.8 ± 28.2 | 302.7 ± 41.5 | ns    |
| Pre-Le                  | 18.9 ± 8.1   | 10.8 ± 1.1   | ns    |
| Le 24h                  | 23.4 ± 9.6   | 14.8 ± 1.1   | ns    |
| Le 7 days               | 46.7 ± 31.6  | 13.8 ± 1.7   | ns    |
| Pre-Hb                  | 22.0 ± 6.6   | 12.3 ± 0.4   | ns    |
| Hb 24h                  | 13.7 ± 3.4   | 10.4 ± 0.4   | ns    |
| Hb 7 days               | 15.8 ± 5.8   | 9.7 ± 0.4    | ns    |
| Pre-Hct                 | 66.4 ± 20.1  | 37.4 ± 1.3   | ns    |
| Hct 24h                 | 40.2 ± 9.8   | 31.2 ± 1.2   | ns    |
| Hct 7 days              | 30.3 ± 1.0   | 29.4 ± 1.3   | ns    |
| Pre-PO <sub>2</sub>     | 111.5 ± 47.6 | 122.6 ± 17.1 | ns    |
| PO <sub>2</sub> 24h     | 135.7 ± 12.4 | 127.2 ± 6.7  | ns    |
| PO <sub>2</sub> 7 days  | 100.2 ± 8.7  | 90.7 ± 14.4  | ns    |
| Pre-PCO <sub>2</sub>    | 42.0 ± 2.4   | 40.6 ± 1.7   | ns    |
| PCO <sub>2</sub> 24h    | 37.5 ± 2.4   | 41.7 ± 1.6   | 0.024 |
| PCO <sub>2</sub> 7 days | 41.6 ± 2.5   | 48.8 ± 3.7   | ns    |
| Pre-pH                  | 7.4 ± 0.1    | 7.3 ± 0.3    | ns    |
| pH 24h                  | 9.0 ± 1.6    | 7.4 ± 0.1    | ns    |
| pH 7 days               | 7.4 ± 0.5    | 7.4 ± 0.2    | ns    |
| Pre-HCO <sub>3</sub>    | 25.9 ± 1.8   | 22.7 ± 0.6   | ns    |
| HCO <sub>3</sub> 24h    | 32.9 ± 11.3  | 26.2 ± 0.9   | 0.002 |
| HCO <sub>3</sub> 7 days | 25.6 ± 1.5   | 34.2 ± 1.7   | 0.001 |
| Pre-Lactic acid         | 9.8 ± 1.8    | 14.4 ± 2.9   | ns    |
| Lactic acid 24h         | 22.7 ± 4.1   | 18.7 ± 4.3   | ns    |
| Lactic acid 7 days      | 11.2 ± 2.3   | 11.8 ± 2.2   | ns    |
